# Supplementary material for: Mental health of people in Australia in the first month of COVID‐19 restrictions: a national survey
Source: PubMed Central journal article supplement (PMC7756394; doi:10.5694/mja2.50831), 2020-10-26
Supplement: MJA2-213-458-s001.pdf [file MJA2-213-458-s001.pdf]

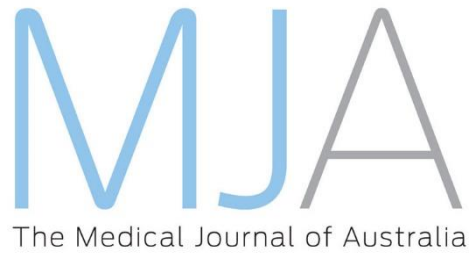

## **Supporting Information**

### **Supplementary methods and results**

**This appendix was part of the submitted manuscript and has been peer reviewed.  
It is posted as supplied by the authors.**

Appendix to: Fisher JRW, Tran TD, Hammarberg K, et al. Mental health of people in Australia in the first month of COVID-19 restrictions: a national survey. *Med J Aust* 2020; doi: 10.5694/mja2.50831.

|                                                                                                                                       |    |
|---------------------------------------------------------------------------------------------------------------------------------------|----|
| Sample size calculation .....                                                                                                         | 2  |
| Data source .....                                                                                                                     | 2  |
| Procedure.....                                                                                                                        | 3  |
| Data management and analysis.....                                                                                                     | 3  |
| Survey.....                                                                                                                           | 5  |
| Survey homepage in Monash University website .....                                                                                    | 18 |
| Advertisement in Facebook .....                                                                                                       | 20 |
| Table 1. Characteristics of respondents with direct experiences of COVID-19: number.....                                              | 24 |
| Table 2 Crosstabs between experience of COVID-19 and COVID-19 restrictions and mental health parameters in the past two weeks: number | 26 |
| Table 3 Summary of comparison data .....                                                                                              | 21 |

## Sample size calculation

A sample size of 8538 people was required to estimate the population prevalence rates in this study. The sample was calculated using the following formula.

$$\text{Sample size} = z^2 * \frac{p * (1 - p)}{e^2} * DEFF$$

Where:

- z (z-score) = 1.96 at a desired confidence level of 95%
- p = estimated prevalence. This study estimated many prevalence rates, so an estimated prevalence rate of 50% was used in this sample size calculation because it gives the largest possible sample size that satisfies all prevalence estimations.
- e = Margin of error at 1.5%

DEFF: design effect that is an adjustment made to calculate a sample size for a survey that the participants were selected using not a simple random method (in this study, respondent driven sampling). We selected a design effect of 2 in this study.

## Data source

A questionnaire including study-specific, fixed response option questions and widely used standardised psychometric instruments.

### **Mental health outcomes**

Psychological symptoms experienced over the previous fortnight were assessed using the Patient Health Questionnaire 9 (PHQ-9), the Generalised Anxiety Disorder Scale (GAD-7), and a study-specific questions assessing optimism about the future.

#### i. Patient Health Questionnaire 9 (PHQ-9)

The PHQ-9<sup>1</sup> is an easily understood self-report 9-item scale asking respondents to endorse each depressive symptom as “0” (not experienced) to “3” (experienced nearly every day). Aggregated responses yield a scale indicative of symptom severity. Formally validated against diagnostic psychiatric interviews, a PHQ-9 score  $\geq 10$  has sensitivity of 88% and specificity of 88% for Major Depression. PHQ-9 scores of 5-9 represent mild, 10-14 moderate, 15-19 moderately severe, and  $\geq 20$  severe depressive symptoms. PHQ-9 Item 9 asks whether the respondent has experienced ‘Thoughts that you would be better off dead or of hurting yourself in some way’.

#### ii. Generalised Anxiety Disorder Scale (GAD-7)

The GAD-7<sup>2</sup> is a 7-item scale assessing common symptoms of anxiety that uses same response options as PHQ-9 and is easily understood and acceptable. In formal validation against psychiatric interviews, a GAD-7 score  $\geq 10$  has sensitivity of 89% and specificity of 82% to detect Generalised Anxiety Disorder. Scores of 5-9 represent mild, 10-14 moderate, and 15-21 severe anxiety. Higher scores are strongly associated with functional impairment. GAD-7 Item 7 asks whether the respondent is ‘Becoming irritable or easily annoyed’.

- iii. Optimism about the future

Optimism about the future was assessed by a visual analogue scale from 0 (not at all optimistic) to 10 (extremely optimistic).

### ***Experience of COVID 19 and the COVID-19 restrictions***

Study-specific questions assessed:

- i. Direct experience of COVID-19: whether the respondent had been diagnosed with or tested for COVID-19, or lived with or knew someone with COVID-19: yes / no.
- ii. Whether a job had been lost because of COVID-19 restrictions: yes / no.
- iii. Worry about contracting COVID-19: a visual analogue scale with scores from 0 (not at all worried) to 10 (extremely worried).
- iv. How badly COVID-19 restrictions had affected daily life: a visual analogue scale with scores from 0 (not at all badly) to 10 (very badly).

### ***Socio-demographic characteristics***

Study-specific questions with fixed response options were used to ascertain age, postcode, gender, whether born overseas or in Australia, living circumstances, and occupation.

Data on State, urban/rural residence, and Index of Relative Socio-economic Advantage and Disadvantage were derived from respondent's postcode using the most recent Australian Bureau of Statistics<sup>3</sup> data.

## Procedure

The survey was built in Qualtrics Insight Platform. Titled How Are You? Living with COVID-19 Restrictions in Australia, it was available online from 3 April 2020, four days after stage two COVID-19 restrictions were implemented, to midnight on 2 May 2020. A link to the survey was hosted on the Monash University website (<https://www.monash.edu/medicine/living-with-covid-19-restrictions-survey>) and information about it was distributed on news<sup>15,16</sup> and social media and through organisational and personal networks, including the Facebook page of the Monash University Global and Women's Health Unit (GWH).

## Data management and analysis

The outcomes were whether, in the last fortnight, the respondent had experienced:

1. Clinically significant symptoms of depression: PHQ-9 scores  $\geq 10$ .
2. Clinically significant symptoms of anxiety: GAD-7 scores  $\geq 10$ .
3. Any thoughts of being better off dead or self-harm: PHQ-9 item 9 score  $> 0$
4. Becoming easily annoyed or irritable: GAD 7 item 6 score  $> 0$
5. High optimism about the future: scores  $\geq 8$ .

The visual analogue scales were each categorised into two groups: not at all or none to moderate (0-7) and high ( $\geq 8$ )

Data were analysed in three stages.

1. Population prevalence rates and 95% CIs of the outcomes, as well as the experiences of COVID-19 and consequent restrictions, were estimated, adjusting for differences in socio-demographic characteristics between the sample and the Australian population. The adjustment was made using weights for proportions of age groups, genders, Index of Relative Socio-economic Advantage and Disadvantage deciles, and states in the sample and the corresponding information in the population (Australian Bureau of Statistics, 2019).<sup>3</sup>
2. Characteristics of respondents with experiences of COVID-19 and the COVID-19 restrictions were examined using multiple logistic regressions. Reported direct experiences of COVID-19, lost jobs, being very worried about contracting COVID-19, and highly adverse impacts of the restrictions were dependent variables and socio-demographic characteristics were the independent variables of the models.
3. Multiple logistic regression analyses were performed to examine associations between each of the mental health outcomes (dependent variables) and experiences of COVID-19 and the COVID-19 restrictions (independent variables), taking into account socio-demographic characteristics (independent variables).

Only complete data were included in analyses, which were conducted using STATA Version 16 (StataCorp). Comparisons were made with nationally representative population data generated with the same instruments with adults in Australia and other high-income nations (Table 1).

Approval to conduct the study was provided by [Institution] University Human Research Ethics Committee (2020-24080-42716)

## HOW ARE YOU?

### Living With COVID-19 Restrictions in Australia

(Monash University Human Research Ethics project ID: 24080)

\*\*\*

To help our governments and the community to understand what life is like during the COVID-19 restrictions, we want as many people as possible to complete this snapshot survey.

This survey is anonymous. We can't know who you are.

We would like to hear from you if you are **18 or older** and **live in Australia!**

It will take only about 10 minutes to answer the questions.

If you want to find out more about the survey before you begin, please click [here](#) for more information.

To begin the survey, please click "NEXT PAGE".

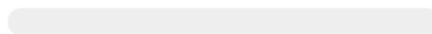

Next Page

Are you living in Australia?

Yes

No

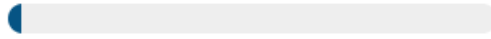

Previous Page

Next Page

Are you above 17 years of age?

Yes

No

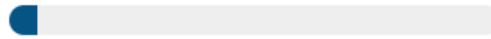

Previous Page

Next Page

**The first group of questions asks about you and your situation**

---

1. How old are you? (years)

2. Do you live:

- On your own
- With only your partner
- With your partner and children
- With children and without a partner
- With adult family members
- In a shared house with non-family members
- Other

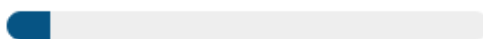

[Previous Page](#)

[Next Page](#)



3. What is your residential postcode?

4. Are you:

- Female
- Male
- Other

5. Were you born in Australia?

- Yes
- No

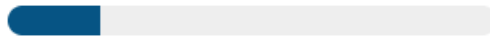

[Previous Page](#)

[Next Page](#)

The next set of questions asks about your experience of COVID-19 pandemic

6. To what extent have you experienced COVID-19?

*(Please answer all items in this question)*

|                                                                 | Yes                   | No                    |
|-----------------------------------------------------------------|-----------------------|-----------------------|
| I have been treated in hospital for COVID-19                    | <input type="radio"/> | <input type="radio"/> |
| I have had COVID-19 but did not have to go to hospital          | <input type="radio"/> | <input type="radio"/> |
| I have been tested for COVID-19                                 | <input type="radio"/> | <input type="radio"/> |
| Someone who lives with me has or has had COVID-19               | <input type="radio"/> | <input type="radio"/> |
| Someone I know who doesn't live with me has or has had COVID-19 | <input type="radio"/> | <input type="radio"/> |

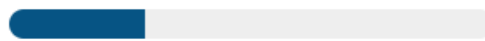

Previous Page

Next Page

7. How worried are you that you will catch COVID-19?

Not at all worried

Extremely worried

- 0    1    2    3    4    5    6    7    8    9    10
- 

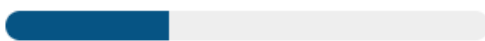

Previous Page

Next Page

## 8. What is your situation at the moment?

*(Please answer all items in this question)*

|                                                       | Yes                   | No                    |
|-------------------------------------------------------|-----------------------|-----------------------|
| I have a job and am working from home                 | <input type="radio"/> | <input type="radio"/> |
| I have a job that I need to leave home to do          | <input type="radio"/> | <input type="radio"/> |
| I am doing unpaid work caring for children            | <input type="radio"/> | <input type="radio"/> |
| I am doing unpaid work caring for dependent relatives | <input type="radio"/> | <input type="radio"/> |
| I have lost my job because of COVID-19                | <input type="radio"/> | <input type="radio"/> |
| I was unemployed before COVID-19                      | <input type="radio"/> | <input type="radio"/> |
| I am retired                                          | <input type="radio"/> | <input type="radio"/> |
| I am a student and my course is delivered online      | <input type="radio"/> | <input type="radio"/> |
| I am a student but my course has been suspended       | <input type="radio"/> | <input type="radio"/> |
| My main source of income is government benefits       | <input type="radio"/> | <input type="radio"/> |

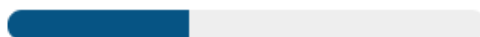

[Previous Page](#)

[Next Page](#)

9. How badly have the COVID-19 restrictions affected your daily life?

Not at all

Very badly

- 0 1 2 3 4 5 6 7 8 9 10
- 
- 

10. Since COVID-19 I am drinking alcohol:

- More than I used to
- Less than I used to
- About the same
- I don't drink alcohol
- 

**The next set of questions is about your health in general**

---

11. Have you been able to get the care you need for non-COVID-19 health conditions or a disability?

- Yes; there's been no change in my health or disability care
- Yes; my health or disability care has been better
- No; my health or disability care has been worse
- I haven't needed health or disability care

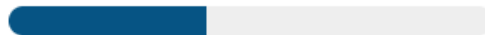

[Previous Page](#)

[Next Page](#)

**The next set of questions is about how you have felt in the last two weeks**

---

12. Over the last 2 weeks, how often have you been bothered by any of the following problems?

*(Please answer all items in this question)*

|                                                                                                                                                                            | Not at all            | Several days          | More than half the days | Nearly every day      |
|----------------------------------------------------------------------------------------------------------------------------------------------------------------------------|-----------------------|-----------------------|-------------------------|-----------------------|
| a. Little interest or pleasure in doing things                                                                                                                             | <input type="radio"/> | <input type="radio"/> | <input type="radio"/>   | <input type="radio"/> |
| b. Feeling down, depressed, or hopeless                                                                                                                                    | <input type="radio"/> | <input type="radio"/> | <input type="radio"/>   | <input type="radio"/> |
| c. Trouble falling or staying asleep, or sleeping too much                                                                                                                 | <input type="radio"/> | <input type="radio"/> | <input type="radio"/>   | <input type="radio"/> |
| d. Feeling tired or having little energy                                                                                                                                   | <input type="radio"/> | <input type="radio"/> | <input type="radio"/>   | <input type="radio"/> |
| e. Poor appetite or overeating                                                                                                                                             | <input type="radio"/> | <input type="radio"/> | <input type="radio"/>   | <input type="radio"/> |
| f. Feeling bad about yourself, or that you are a failure, or have let yourself or your family down                                                                         | <input type="radio"/> | <input type="radio"/> | <input type="radio"/>   | <input type="radio"/> |
| g. Trouble concentrating on things, such as reading the newspaper or watching television                                                                                   | <input type="radio"/> | <input type="radio"/> | <input type="radio"/>   | <input type="radio"/> |
| h. Moving or speaking so slowly that other people could have noticed. Or the opposite, being so fidgety or restless that you have been moving around a lot more than usual | <input type="radio"/> | <input type="radio"/> | <input type="radio"/>   | <input type="radio"/> |
| i. Thoughts that you would be better off dead, or of hurting yourself in some way                                                                                          | <input type="radio"/> | <input type="radio"/> | <input type="radio"/>   | <input type="radio"/> |

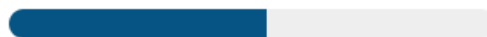

[Previous Page](#)

[Next Page](#)

13. Over the last 2 weeks, how often have you been bothered by any of the following problems?

*(Please answer all items in this question)*

|                                                      | Not at all            | Several days          | More than half the days | Nearly every day      |
|------------------------------------------------------|-----------------------|-----------------------|-------------------------|-----------------------|
| a. Feeling nervous, anxious or on edge               | <input type="radio"/> | <input type="radio"/> | <input type="radio"/>   | <input type="radio"/> |
| b. Not being able to stop or control worrying        | <input type="radio"/> | <input type="radio"/> | <input type="radio"/>   | <input type="radio"/> |
| c. Worrying too much about different things          | <input type="radio"/> | <input type="radio"/> | <input type="radio"/>   | <input type="radio"/> |
| d. Trouble relaxing                                  | <input type="radio"/> | <input type="radio"/> | <input type="radio"/>   | <input type="radio"/> |
| e. Being so restless that it is hard to sit still    | <input type="radio"/> | <input type="radio"/> | <input type="radio"/>   | <input type="radio"/> |
| f. Becoming easily annoyed or irritable              | <input type="radio"/> | <input type="radio"/> | <input type="radio"/>   | <input type="radio"/> |
| g. Feeling afraid as if something awful might happen | <input type="radio"/> | <input type="radio"/> | <input type="radio"/>   | <input type="radio"/> |

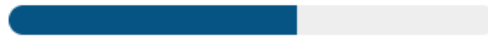

[Previous Page](#)

[Next Page](#)

The last set of questions is about the impact of COVID-19 on your life:

14. Please tell us up to three bad things that have happened to you because of the COVID-19 restrictions

Bad thing 1:

Bad thing 2:

Bad thing 3:

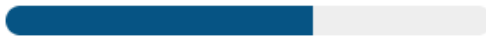

Previous Page

Next Page

15. Please tell us up to three good things that have happened to you because of the COVID-19 restrictions

---

Good thing 1:

---

Good thing 2:

---

Good thing 3:

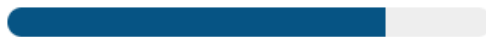

[Previous Page](#)

[Next Page](#)



16. Please tell us in general how optimistic you feel about the future

Not at all optimistic

Extremely optimistic

|                       |                       |                       |                       |                       |                       |                       |                       |                       |                       |                       |
|-----------------------|-----------------------|-----------------------|-----------------------|-----------------------|-----------------------|-----------------------|-----------------------|-----------------------|-----------------------|-----------------------|
| 0                     | 1                     | 2                     | 3                     | 4                     | 5                     | 6                     | 7                     | 8                     | 9                     | 10                    |
| <input type="radio"/> | <input type="radio"/> | <input type="radio"/> | <input type="radio"/> | <input type="radio"/> | <input type="radio"/> | <input type="radio"/> | <input type="radio"/> | <input type="radio"/> | <input type="radio"/> | <input type="radio"/> |

17. Please write anything else you would like us to know about your experience of COVID-19 (up to 250 characters)

Characters remaining: 250

Please click "NEXT PAGE" to submit the survey.

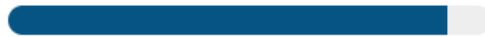

Previous Page

Next Page

Thank you for completing the survey. Your response has been recorded. Please encourage other people to complete it by sending this link: <https://tinyurl.com/Covid19-Restrictions>

We will give the results to governments and other organisations to help them understand what people need now and to prepare for similar circumstances in the future.

You can see the survey results in a few weeks [here](#).

If you are feeling distressed, there are places you can contact for help:

Your GP

[Beyond blue](#) (phone number: 1300 22 4636)

[Lifeline](#) (phone number: 13 11 14)

For advice and information, go to: [Government of Australia](#)

# Survey homepage in Monash University website

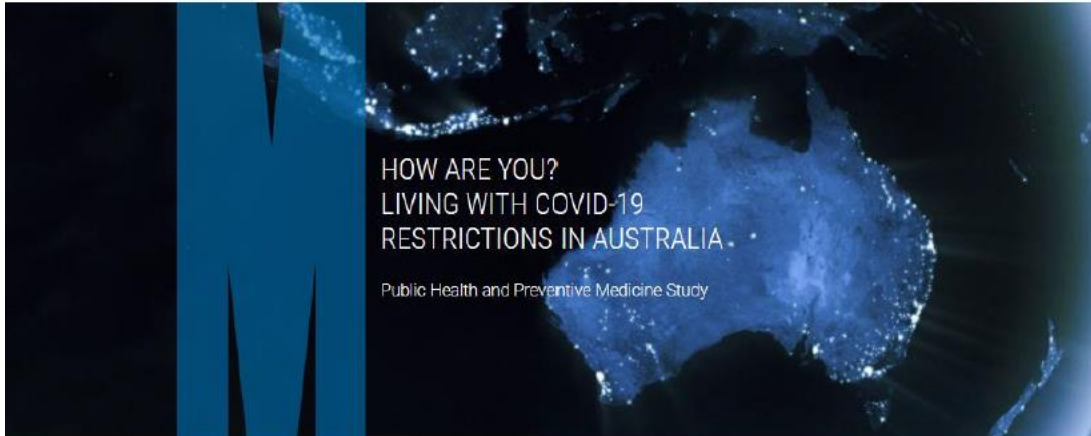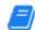

## HOW ARE YOU? LIVING WITH COVID-19 RESTRICTIONS IN AUSTRALIA

Monash University Human Research Ethics project ID: 24080

Australia has never experienced anything on the scale of COVID-19 and the temporary restrictions designed to limit the spread. These are likely to affect everyone's sense of wellbeing.

Monash University's School of Public Health and Preventive Medicine has created a short, anonymous, online survey to measure the ways in which COVID-19 is affecting people.

If you are over 18 and living in Australia, we want to know about your experiences with COVID-19 restrictions.

[Please complete the survey here.](#)

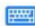

## ABOUT THE SURVEY

[The survey](#) asks questions about your life during the COVID-19 crisis. The survey is anonymous. We can't know who you are.

YOU NEED TO BE AT LEAST 18 YEARS OLD and LIVING IN AUSTRALIA to participate in the survey.

The survey takes about 10 minutes to complete.

There will be a second survey a few weeks later. The third survey will take place after all the restrictions are lifted.

We encourage you to answer the questions every time they're posted. However, it's still helpful if you do it only once or twice.

The survey will be available online for about two weeks each time.

The results of the survey will be made available on this website. Be sure to visit this site again to check for the results.

## RESEARCH AND FUNDING

This study is being led by [Professor Jane Fisher](#), Director, and [Dr Maggie Kirkman](#), Senior Research Fellow, from the [Global and Women's Health](#) unit at Monash University's [School of Public Health and Preventive Medicine](#).

The research will help us to understand what it's like to live with the temporary limits on normal life to protect us all from COVID-19. We will share the results widely to help governments and other organisations understand what people need now and to prepare for the future.

Alongside questions about potential negative impacts, we ask about any benefits you've experienced from the COVID-19 restrictions.

This research was made possible by a generous donation from Professor John McBain and Dr Penny Foster. Neither the researchers nor the donors have any conflict of interest in the research.

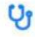

## RECOGNISING DISENFRANCHISED GRIEF AMID COVID-19

Professor Jane Fisher and Dr Maggie Kirkman recently applied their knowledge to the coronavirus pandemic, sharing their thoughts on the problems associated with disenfranchised grief in Monash's online publication [Lens](#).

Disenfranchised grief is the term applied to experiences of loss that might not be recognised, either by the person experiencing the loss or by others. As with recognised grief (such as the death of a loved one), disenfranchised grief is accompanied by disbelief and shock, wishing reality was different or as it was before the loss, and then uncertainty and sadness as reality grows. Disenfranchised grief can be more psychologically damaging than grief that is recognised and supported.

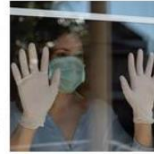

### More information

There are places you can contact for help and information:

- Your GP
- Beyond Blue: [beyondblue.org.au](https://www.beyondblue.org.au)
- Government of Australia: [australia.gov.au](https://www.australia.gov.au)

## CONTACT US

**School of Public Health and Preventive Medicine, Monash University**

If you would like to know more about the survey, you can contact the researchers:

**Professor Jane Fisher**

Email: [Jane.Fisher@monash.edu](mailto:Jane.Fisher@monash.edu)

**Dr Maggie Kirkman**

Email: [Maggie.Kirkman@monash.edu](mailto:Maggie.Kirkman@monash.edu)

→ [Please complete the survey here.](#)

## Advertisement in Facebook

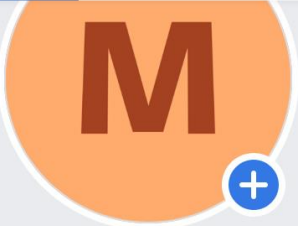

**Monash University GWH research**  
Create Page @Username

- Home
- Posts
- Jobs
- Events
- Reviews
- Videos
- Photos
- About
- Community
- Offers

**Promote**

Visit Ad Center

Like Follow Share ...

**Monash University GWH research**  
April 27 · 🌐

Please take part in our anonymous, online survey.  
Full link:  
<https://www.monash.edu/.../living-with-covid-19-restrictions-...>

It will help Monash University to understand the impact of the COVID-19 restrictions. The survey is open to all people 18+ living in Australia, and takes 10 minutes to complete.

Results will be published on our website and more widely. Thank you for your participation.



Monash University GWH research

Send Message

Table 1. Characteristics of respondents with direct experiences of COVID-19: number

|                                      | Any direct experience of COVID-19 |      | Lost a job because of COVID-19 |     | Greatly worried about contracting COVID-19 |      | High negative impact of COVID-19 restrictions |      |
|--------------------------------------|-----------------------------------|------|--------------------------------|-----|--------------------------------------------|------|-----------------------------------------------|------|
|                                      | No                                | Yes  | No                             | Yes | No                                         | Yes  | No                                            | Yes  |
| State                                |                                   |      |                                |     |                                            |      |                                               |      |
| New South Wales                      | 2258                              | 495  | 2518                           | 235 | 2296                                       | 457  | 2094                                          | 659  |
| Victoria                             | 5159                              | 946  | 5505                           | 600 | 5113                                       | 992  | 4445                                          | 1660 |
| Queensland                           | 1651                              | 288  | 1752                           | 187 | 1623                                       | 316  | 1453                                          | 486  |
| Western Australia                    | 1037                              | 140  | 1069                           | 108 | 1017                                       | 160  | 930                                           | 247  |
| South Australia                      | 704                               | 132  | 777                            | 59  | 703                                        | 133  | 655                                           | 181  |
| Tasmania                             | 380                               | 65   | 410                            | 35  | 384                                        | 61   | 349                                           | 96   |
| Australian Capital Territory         | 399                               | 66   | 445                            | 20  | 410                                        | 55   | 375                                           | 90   |
| Northern Territory                   | 94                                | 15   | 102                            | 7   | 98                                         | 11   | 93                                            | 16   |
| Major city or Regional/remote areas  |                                   |      |                                |     |                                            |      |                                               |      |
| Major city                           | 4139                              | 645  | 4356                           | 428 | 3998                                       | 786  | 3744                                          | 1040 |
| regional/remote areas                | 7543                              | 1502 | 8222                           | 823 | 7646                                       | 1399 | 6650                                          | 2395 |
| Socio-economic position <sup>†</sup> |                                   |      |                                |     |                                            |      |                                               |      |
| Quintile 1 (lowest)                  | 963                               | 130  | 1006                           | 87  | 877                                        | 216  | 826                                           | 267  |
| Quintile 2                           | 1350                              | 191  | 1418                           | 123 | 1311                                       | 230  | 1197                                          | 344  |
| Quintile 3                           | 1918                              | 310  | 2007                           | 221 | 1845                                       | 383  | 1702                                          | 526  |
| Quintile 4                           | 2612                              | 426  | 2749                           | 289 | 2554                                       | 484  | 2244                                          | 794  |
| Quintile 5 (highest)                 | 4839                              | 1090 | 5398                           | 531 | 5057                                       | 872  | 4425                                          | 1504 |
| Sex                                  |                                   |      |                                |     |                                            |      |                                               |      |
| Women                                | 8773                              | 1661 | 9470                           | 964 | 8704                                       | 1730 | 7773                                          | 2661 |
| Men                                  | 2853                              | 475  | 3051                           | 277 | 2891                                       | 437  | 2575                                          | 753  |
| Other                                | 56                                | 11   | 57                             | 10  | 49                                         | 18   | 46                                            | 21   |
| Age (years)                          |                                   |      |                                |     |                                            |      |                                               |      |

|                                                                         | Any direct experience of COVID-19 |      | Lost a job because of COVID-19 |     | Greatly worried about contracting COVID-19 |      | High negative impact of COVID-19 restrictions |      |
|-------------------------------------------------------------------------|-----------------------------------|------|--------------------------------|-----|--------------------------------------------|------|-----------------------------------------------|------|
|                                                                         | No                                | Yes  | No                             | Yes | No                                         | Yes  | No                                            | Yes  |
| 18–29                                                                   | 1087                              | 250  | 1059                           | 278 | 1195                                       | 142  | 951                                           | 386  |
| 30–39                                                                   | 1896                              | 398  | 2080                           | 214 | 1977                                       | 317  | 1679                                          | 615  |
| 40–49                                                                   | 2385                              | 469  | 2631                           | 223 | 2404                                       | 450  | 2141                                          | 713  |
| 50–59                                                                   | 2564                              | 500  | 2757                           | 307 | 2550                                       | 514  | 2344                                          | 720  |
| 60–69                                                                   | 2451                              | 382  | 2636                           | 197 | 2319                                       | 514  | 2168                                          | 665  |
| 70 or more                                                              | 1299                              | 148  | 1415                           | 32  | 1199                                       | 248  | 1111                                          | 336  |
| Living situation                                                        |                                   |      |                                |     |                                            |      |                                               |      |
| Living alone                                                            | 2302                              | 358  | 2452                           | 208 | 2203                                       | 457  | 1938                                          | 722  |
| With partner/partner and children/adult family members                  | 8105                              | 1525 | 8798                           | 832 | 8115                                       | 1515 | 7381                                          | 2249 |
| With children and without a partner                                     | 492                               | 86   | 510                            | 68  | 485                                        | 93   | 403                                           | 175  |
| In a shared house with non-family members/other                         | 783                               | 178  | 818                            | 143 | 841                                        | 120  | 672                                           | 289  |
| Born overseas or Born in Australia                                      |                                   |      |                                |     |                                            |      |                                               |      |
| Born overseas                                                           | 9075                              | 1604 | 9708                           | 971 | 9015                                       | 1664 | 8035                                          | 2644 |
| Born in Australia                                                       | 2607                              | 543  | 2870                           | 280 | 2629                                       | 521  | 2359                                          | 791  |
| Main occupation (before COVID-19)                                       |                                   |      |                                |     |                                            |      |                                               |      |
| Paid employment (full or part time)                                     | 6894                              | 1436 | 7393                           | 937 | 7102                                       | 1228 | 6341                                          | 1989 |
| Unpaid work caring for children/dependent relatives only, or unemployed | 1012                              | 134  | 1146                           | 0   | 918                                        | 228  | 827                                           | 319  |
| Student                                                                 | 1096                              | 247  | 1078                           | 265 | 1172                                       | 171  | 910                                           | 433  |
| Retired                                                                 | 2680                              | 330  | 2961                           | 49  | 2452                                       | 558  | 2316                                          | 694  |

Table 2. Crosstabs between experience of COVID-19 and COVID-19 restrictions and mental health parameters in the past two weeks: number

| Experience of COVID-19 and restrictions    | Mental health parameter                       |      |                                            |      |                                                |      |                             |      |                                 |      |
|--------------------------------------------|-----------------------------------------------|------|--------------------------------------------|------|------------------------------------------------|------|-----------------------------|------|---------------------------------|------|
|                                            | Clinically significant symptoms of depression |      | Clinically significant symptoms of anxiety |      | Thoughts of self-harm or being better off dead |      | Easily annoyed or irritable |      | Great optimism about the future |      |
|                                            | No                                            | Yes  | No                                         | Yes  | No                                             | Yes  | No                          | Yes  | No                              | Yes  |
| Any experience                             |                                               |      |                                            |      |                                                |      |                             |      |                                 |      |
| No                                         | 8830                                          | 2852 | 8830                                       | 2852 | 10261                                          | 1421 | 4727                        | 6955 | 7838                            | 3487 |
| Yes                                        | 1559                                          | 588  | 1559                                       | 588  | 1876                                           | 271  | 767                         | 1380 | 1497                            | 588  |
| Job lost because of restrictions           |                                               |      |                                            |      |                                                |      |                             |      |                                 |      |
| No                                         | 9638                                          | 2940 | 9638                                       | 2940 | 11111                                          | 1467 | 5123                        | 7455 | 8402                            | 3799 |
| Yes                                        | 751                                           | 500  | 751                                        | 500  | 1026                                           | 225  | 371                         | 880  | 933                             | 276  |
| Greatly worried about contracting COVID-19 |                                               |      |                                            |      |                                                |      |                             |      |                                 |      |
| No                                         | 9003                                          | 2641 | 9003                                       | 2641 | 10317                                          | 1327 | 4810                        | 6834 | 7780                            | 3531 |
| Yes                                        | 1386                                          | 799  | 1386                                       | 799  | 1820                                           | 365  | 684                         | 1501 | 1555                            | 544  |
| Great negative impact of restrictions      |                                               |      |                                            |      |                                                |      |                             |      |                                 |      |
| No                                         | 8474                                          | 1920 | 8474                                       | 1920 | 9405                                           | 989  | 4603                        | 5791 | 6770                            | 3299 |
| Yes                                        | 1915                                          | 1520 | 1915                                       | 1520 | 2732                                           | 703  | 891                         | 2544 | 2565                            | 776  |



Table 3 Summary of comparison data

| <b>Proportions of people scoring <math>\geq 10</math> (indicating point prevalence of moderate to severe depressive symptoms) and 4 – 9 (point prevalence mild to moderate symptoms) on PHQ-9 in the previous 30 days</b> |                |                                                             |                             |              |
|---------------------------------------------------------------------------------------------------------------------------------------------------------------------------------------------------------------------------|----------------|-------------------------------------------------------------|-----------------------------|--------------|
| <b>Author/year</b>                                                                                                                                                                                                        | <b>Country</b> | <b>Participants</b>                                         | <b><math>\geq 10</math></b> | <b>4 - 9</b> |
| <b>Participants randomly selected from the general community</b>                                                                                                                                                          |                |                                                             |                             |              |
| Patten & Schopflocher (2009) <sup>4</sup>                                                                                                                                                                                 | Canada         | 3304 people aged at least 18 years                          | 3.3%                        |              |
| Shim et al. (2011) <sup>5</sup>                                                                                                                                                                                           | USA            | 10,283 people aged at least 18 years                        | 6.9%                        | 16.97%       |
| Johansson et al. (2013) <sup>6</sup>                                                                                                                                                                                      | Sweden         | 1329 people aged at least 18 years                          | 10.8%                       |              |
| Kocalevent et al. (2013) <sup>7</sup>                                                                                                                                                                                     | Germany        | 5018 people aged at least 18 years                          | 5.6%                        |              |
| Kiely & Butterworth (2015) <sup>8</sup>                                                                                                                                                                                   | Australia      | 546 people aged 32 to 35 years and 1515 aged 52 to 58 years | 3%*                         |              |
| <b>Participants selected from people attending general practices</b>                                                                                                                                                      |                |                                                             |                             |              |
| Pirkis et al. (2009) <sup>9</sup>                                                                                                                                                                                         | Australia      | >22,000 people aged >59 consulting a GP                     | 8.2%                        |              |
| Carey et al. (2014) <sup>10</sup>                                                                                                                                                                                         | Australia      | 1004 people consulting a GP                                 | 13%                         |              |
| <b>Specific population groups</b>                                                                                                                                                                                         |                |                                                             |                             |              |
| Farrer et al. (2016) <sup>11</sup>                                                                                                                                                                                        | Australia      | 611 university students                                     | 7.9%                        |              |

| <b>Proportion of people scoring <math>\geq 10</math> on the GAD-7, indicating point prevalence of moderate to severe anxiety symptoms in the prior 30 days</b> |                |                                                                                      |                         |  |
|----------------------------------------------------------------------------------------------------------------------------------------------------------------|----------------|--------------------------------------------------------------------------------------|-------------------------|--|
| <b>Author/year</b>                                                                                                                                             | <b>Country</b> | <b>Participants</b>                                                                  | <b>Point prevalence</b> |  |
| <b>Participants randomly selected from the general community</b>                                                                                               |                |                                                                                      |                         |  |
| Johansson et al. (2013) <sup>6</sup>                                                                                                                           | Sweden         | 1329 people aged at least 18 years                                                   | 14.7% $\geq 8$          |  |
| Hinz et al (2017) <sup>12</sup>                                                                                                                                | Germany        | 9721 people aged at least 18 years                                                   | 5.9% $\geq 10$          |  |
| <b>Specific population groups</b>                                                                                                                              |                |                                                                                      |                         |  |
| Farrer et al. (2016) <sup>11</sup>                                                                                                                             | Australia      | 611 university students                                                              | 17.5% $\geq 10$         |  |
| Hammarberg et al (2019) <sup>13</sup>                                                                                                                          | Australia      | 4947 women aged > 49 years from the general community responding to an online survey | 10.6% $\geq 10$         |  |
| <b>Proportion of people reporting thoughts of wanting to die, or of contemplating self-harm 'recently'</b>                                                     |                |                                                                                      |                         |  |
| <b>Author/year</b>                                                                                                                                             | <b>Country</b> | <b>Participants</b>                                                                  | <b>Point prevalence</b> |  |
| <b>Participants randomly selected from the general community</b>                                                                                               |                |                                                                                      |                         |  |
| Goldney et al (2000) <sup>14</sup>                                                                                                                             | Australia      | 2501 people in South Australia aged at least 18 years                                | 1.8%                    |  |

*PHQ-9: Patient Health Questionnaire 9*

*GAD-7: Generalised Anxiety Disorder Scale*

*GP: general practitioner*

\*Diagnosis of any depressive episode in prior 30 days detected with a sensitivity of 0.64 and a specificity of 0.92 by a PHQ 9 score  $\geq 10$

## References

1. Kroenke K, Spitzer RL, Williams JBW. The PHQ-9: Validity of a brief depression severity measure. *J Gen Intern Med* 2001; 16: 606-13.
2. Spitzer RL, Kroenke K, Williams JBW, et al. A Brief Measure for Assessing Generalized Anxiety Disorder: The GAD-7. *Arch Intern Med* 2006; 166: 1092-7.
3. Australian Bureau of Statistics. 3101.0 - Australian Demographic Statistics, Sep 2019. Canberra: Australian Bureau of Statistics; 2019.  
<https://www.abs.gov.au/AUSSTATS/abs@.nsf/DetailsPage/3101.0Sep%202019?OpenDocument> (accessed May 2020).
4. Patten SB, Schopflocher D. Longitudinal epidemiology of major depression as assessed by the Brief Patient Health Questionnaire (PHQ-9). *Compr Psychiatry* 2009; 50: 26-33.
5. Shim RS, Baltrus P, Ye J, et al. Prevalence, treatment, and control of depressive symptoms in the United States: results from the National Health and Nutrition Examination Survey (NHANES), 2005-2008. *J Am Board Fam Med* 2011; 24: 33-8.
6. Johansson R, Carlbring P, Heedman as, et al. Depression, anxiety and their comorbidity in the Swedish general population: point prevalence and the effect on health-related quality of life. *PeerJ* 2013; 1: e98.
7. Kocalevent R-D, Hinz A, Brähler E. Standardization of the depression screener Patient Health Questionnaire (PHQ-9) in the general population. *Gen Hosp Psychiatry* 2013; 35: 551-5.
8. Kiely KM, Butterworth P. Validation of four measures of mental health against depression and generalized anxiety in a community based sample. *Psychiatry Res* 2015; 225: 291-8.
9. Pirkis J, Pfaff J, Williamson M, et al. The community prevalence of depression in older Australians. *J Affect Disord* 2009; 115: 54-61.
10. Carey M, Jones KA, Yoong SL, et al. Comparison of a single self-assessment item with the PHQ-9 for detecting depression in general practice. *Fam Pract* 2014; 31: 483-9.
11. Farrer LM, Gulliver A, Bennett K, et al. Demographic and psychosocial predictors of major depression and generalised anxiety disorder in Australian university students. *BMC Psychiatry* 2016; 16: 241.
12. Hinz A, Klein AM, Brähler E, et al. Psychometric evaluation of the Generalized Anxiety Disorder Screener GAD-7, based on a large German general population sample. *J Affect Disord* 2017; 210: 338-44.
13. Hammarberg K, Holton S, Michelmore J, et al. Thriving in older age: A national survey of women in Australia. *Maturitas* 2019; 122: 60-5.
14. Goldney RD, Wilson D, Grande ED, et al. Suicidal Ideation in a Random Community Sample: Attributable Risk Due to Depression and Psychosocial and Traumatic Events. *Aust N Z J Psychiatry* 2000; 34: 98-106.
15. Fisher J. How are you? Living with COVID-19 restrictions in Australia. *Lens* (Monash University, Melbourne) [online], 8 Apr 2020. <https://lens.monash.edu/@medicine-health/2020/04/08/1380027/how-are-you-living-with-covid-19-restrictions-in-australia>
16. Scott S, Kinsella E. Mental health and COVID-19: how the coronavirus is affecting our way of life. ABC Online, 18 Apr 2020. <https://www.abc.net.au/news/2020-04-18/mental-health-and-coronavirus-how-australia-is-reacting-covid19/12159750>
